# Supplementary material for: A high throughput screen for next-generation leads targeting malaria parasite transmission
Source: PubMed Central journal article supplement (PMC6143625; doi:10.1038/s41467-018-05777-2), 2018-09-18
Supplement: 41467_2018_5777_MOESM1_ESM.pdf [file 41467_2018_5777_MOESM1_ESM.pdf]

**A high throughput screen for next-generation leads targeting malaria parasite transmission**

Michael J. Delves<sup>1†</sup>, Celia Miguel-Blanco<sup>1,2†</sup>, Holly Matthews<sup>1</sup>, Irene Molina<sup>2</sup>, Andrea Ruecker<sup>1</sup>, Sabrina Yahiya<sup>1</sup>, Ursula Straschil<sup>1</sup>, Matthew Abraham<sup>3</sup>, María Luisa León<sup>2</sup>, Oliver J. Fischer<sup>4</sup>, Ainoa Rueda-Zubiaurre<sup>4</sup>, Jochen R. Brandt<sup>4</sup>, Álvaro Cortés<sup>2</sup>, Anna Barnard<sup>4</sup>, Matthew J. Fuchter<sup>4</sup>, Félix Calderón<sup>2</sup>, Elizabeth A. Winzeler<sup>3</sup>, Robert E. Sinden<sup>1</sup>, Esperanza Herreros<sup>2</sup>, Francisco J. Gamo<sup>2\*</sup> and Jake Baum<sup>1\*</sup>

Correspondence to: Jake Baum ([jake.baum@imperial.ac.uk](mailto:jake.baum@imperial.ac.uk)), Department of Life Sciences, Imperial College London, Exhibition Road, South Kensington, London SW7 2AZ, United Kingdom; Dr Francisco Javier Gamo ([francisco-javier.b.gamo@gsk.com](mailto:francisco-javier.b.gamo@gsk.com)) GSK, C. Severo Ochoa 2, Tres Cantos 28760, Spain.

**This file includes:**

Supplementary Methods  
Supplementary Figures 1 to 6  
Supplementary Table 1  
Supplementary References

23 **SUPPLEMENTARY METHODS**

24 **Abbreviations:** 1-Ethyl-3-(3-dimethylaminopropyl)carbodiimide (EDC); Hydroxybenzotriazole (HOBT);  
25 Dimethylformamide (DMF); Dichloromethane (DCM); Ethyl acetate (AcOEt); Petroleum ether (PE)

26 **Identification of commercial DDD01027599 as N-(4-bromophenyl)-2-chloroacetamide (BPCA)**

27 After promising compound profiling with commercially available DDD01027599 (Life Chemicals,  
28 F3316-0293), compound re-synthesis was carried out internally at GlaxoSmithKline (GSK) by the  
29 following route:

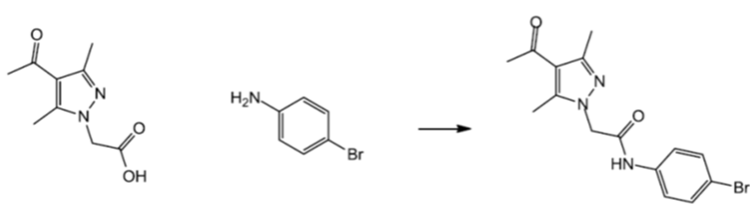

31 Over a stirred mixture of 2-(4-acetyl-3,5-dimethyl-1H-pyrazol-1-yl)acetic acid (100mg, 0.51mmol),  
32 HOBT (0.61mmol), EDC (0.51mmol) and DIEA (0.18ml, 1.09mmol) in DMF (3 mL), 4-bromoaniline  
33 (0.51mmol) was added. The reaction mixture was stirred at room temperature for 24h. The mixture  
34 was partitioned between ethyl acetate (3 mL) and 1N aqueous NH<sub>4</sub>Cl (3mL). The phases were  
35 separated and the aqueous one was re-extracted with ethyl acetate. The organic layers were  
36 combined and washed with saturated NaHCO<sub>3</sub>, dried over Na<sub>2</sub>SO<sub>4</sub>, filtered and evaporated. Crude  
37 was purified by chromatography (cyclohexane/AcOEt) affording the desired compound.

38 The structure of the final synthesised compound was confirmed by NMR and LC/MS analysis.

39 However, unlike commercial DDD01027599, it was inactive against asexuals and male/female  
40 gametocytes (IC<sub>50</sub> >50uM). When the LC/MS and NMR spectra for both compounds were compared,  
41 significant differences were observed (Figures S1 + S2).

42 **Synthesis of OJF-034, in house derivative of DDD01035881**

43 5-bromo-2-thiophenecarboxylic acid (104 mg, 0.55 mmol), EDC (71 mg, 0.68 mmol) and HOBT (92  
44 mg, 0.68 mmol) were dissolved in anhydrous DMF (10 mL) under an argon atmosphere and cooled to

45 0°C. 4-(aminomethyl)chroman-4-ol (80 mg, 0.45 mmol) dissolved in anhydrous DCM (2 mL) was then  
46 added followed by trimethylamine. The reaction mixture was then stirred at 0°C for 30 minutes before  
47 being warmed to room temperature and stirred overnight. The solution was then diluted with DCM (80  
48 mL) and washed with LiCl (5%, 3 x 100 mL) and brine (100 mL). The organic phase was dried over  
49 MgSO<sub>4</sub>, filtered and the filtrate evaporated to give the crude product as a yellow oil. The product was  
50 purified via flash column chromatography on deactivated silica (PE: Et<sub>2</sub>O – 1:3) and was isolated as a  
51 white solid (81 mg, 0.25 mmol, 55%). <sup>1</sup>H NMR (400 MHz, Methanol-d<sub>4</sub>) δ 2.03 (ddd, *J* = 14.2, 8.8, 3.9  
52 Hz, 1H), 2.15 (ddd, *J* = 13.9, 6.3, 3.2 Hz, 1H), 3.65 (d, *J* = 14.0 Hz, 1H), 3.86 (d, *J* = 14.0 Hz, 1H),  
53 4.21 – 4.36 (m, 2H), 6.80 (dd, *J* = 8.2, 1.3 Hz, 1H), 6.94 (td, *J* = 7.6, 7.6, 1.2 Hz, 1H), 7.15 – 7.21 (m,  
54 2H), 7.50 – 7.56 (m, 2H). <sup>13</sup>C NMR (101 MHz, Methanol-d<sub>4</sub>) δ 32.85, 63.19, 68.56, 116.37, 117.79,  
55 120.09, 126.21, 126.80, 128.75, 128.85, 130.91, 140.44, 154.49, 162.32. MS: *m/z* (ES) 366 [M-H]<sup>-</sup>.  
56 HRMS, found 365.9771 (C<sub>15</sub>H<sub>13</sub>NO<sub>3</sub>SBr, [M-H]<sup>-</sup>, requires 365.9756). TLC (hexane:EtOAc - 1:1) R<sub>f</sub>:  
57 0.29.

58

59 SUPPLEMENTARY FIGURES

**Resynthesised DDD1027599**

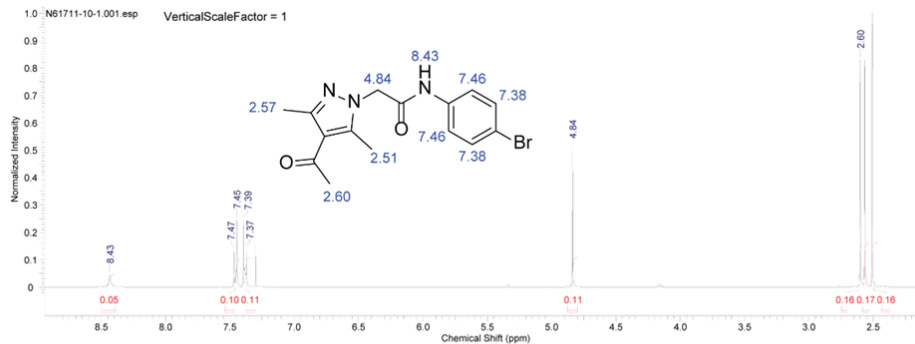

**Commercial DDD1027599**

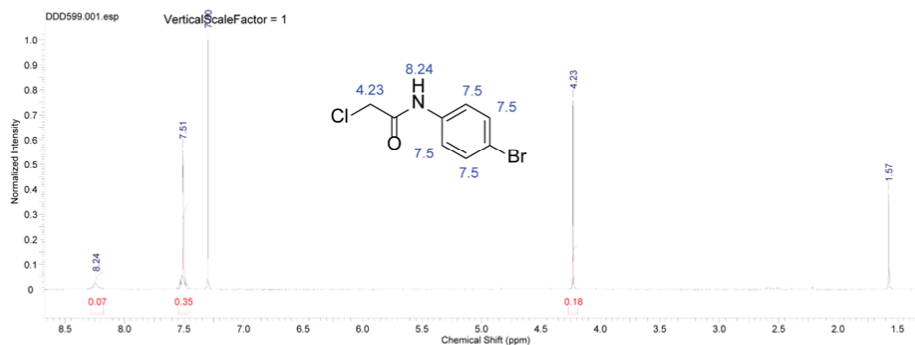

**BPCA**

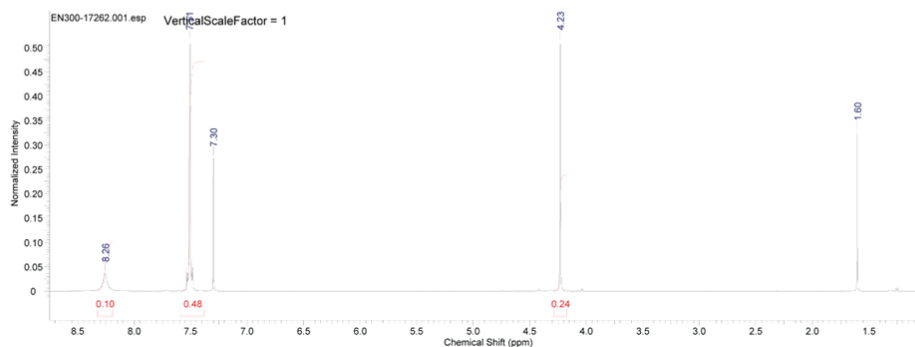

60

61 **Supplementary Figure 1 | Comparative NMR spectra for internally synthesised DDD01027599,**  
 62 **commercial DDD01027599 and N-(4-bromophenyl)-2-chloroacetamide (BPCA).**

63 Commercial DDD01027599 possessed peaks corresponding to the aromatic ring (around 7.5ppm), but peaks  
 64 corresponding to the methyl groups (around 2.5 ppm) were absent, suggesting that the 3,5 dimethyl 1-H pyrazol  
 65 moiety was not present in this compound.

### Resynthesised DDD1027599

0.1mg/ml

N61711-10-1AA 79 (1.102)

1: Scan ES+  
7.99e6

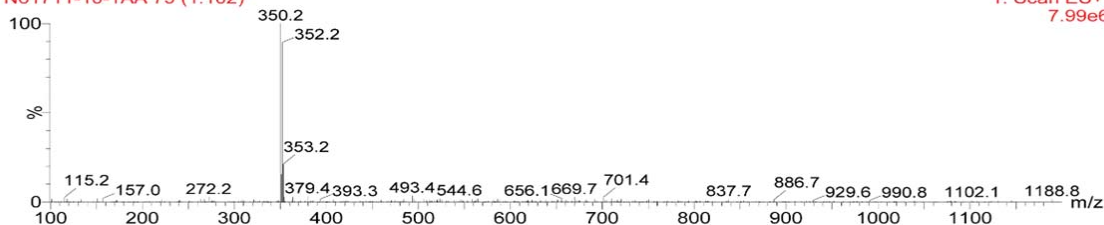

### Commercial DDD1027599

0.1mg/ml

DDD01027599AA 81 (1.137)

2: Scan ES-  
3.65e6

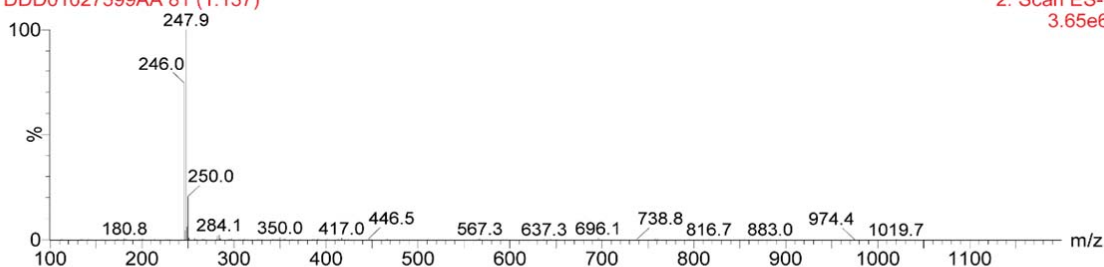

### BPCA

0.1mg/ml

EN300-17262AA 81 (1.137)

2: Scan ES-  
3.35e6

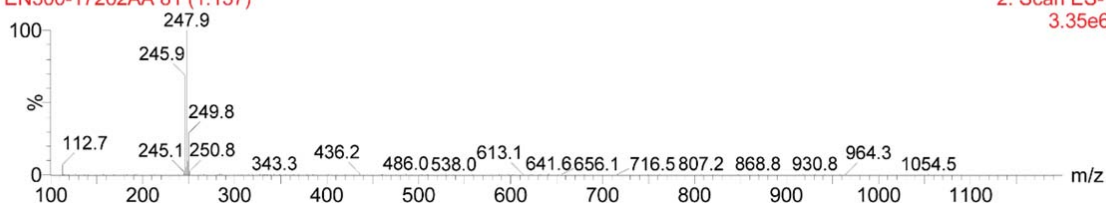

66

### 67 **Supplementary Figure 2 | Comparative LCMS spectra for internally synthesised DDD01027599,** 68 **commercial DDD01027599 and N-(4-bromophenyl)-2-chloroacetamide (BPCA).**

69 LC/MS analysis showed that whilst re-synthesised DDD01027599 had a molecular weight of ~350 (expected to  
70 be 350.22), commercial DDD01027599 had a molecular weight of ~248. In addition, high-resolution MS  
71 spectrum for DDD01027599 showed the typical pattern for a bromine/chlorine combination. Based on this  
72 information the most likely structure proposed for commercial DDD01027599 was N-(4-bromophenyl)-2-  
73 chloroacetamide (BPCA) (as shown in [Supplementary Fig. 1](#)).

74

75

76

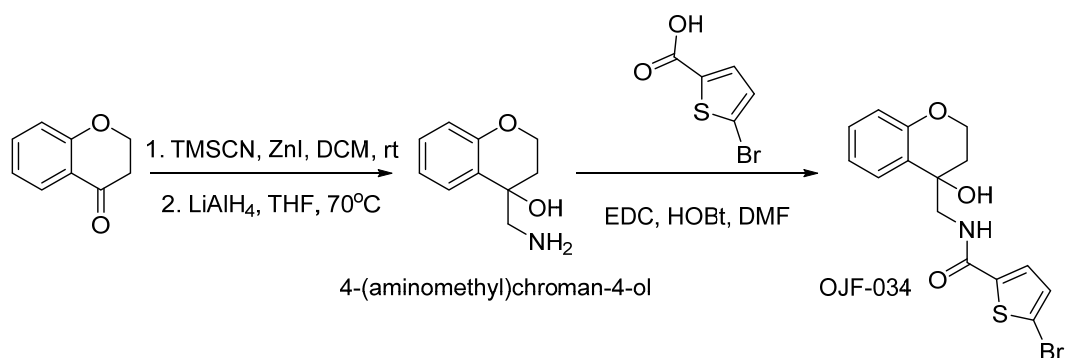

77

78 **Supplementary Figure 3 | Synthesis of OJF-034.**

79 **OJF-034, an analogue of DDD881 possessing an amide rather than sulphonamide linker was**  
80 **synthesised from 4-chromanone a 70% yield over 2 steps according to literature procedures<sup>1,2</sup>.**

81

82

83 a.

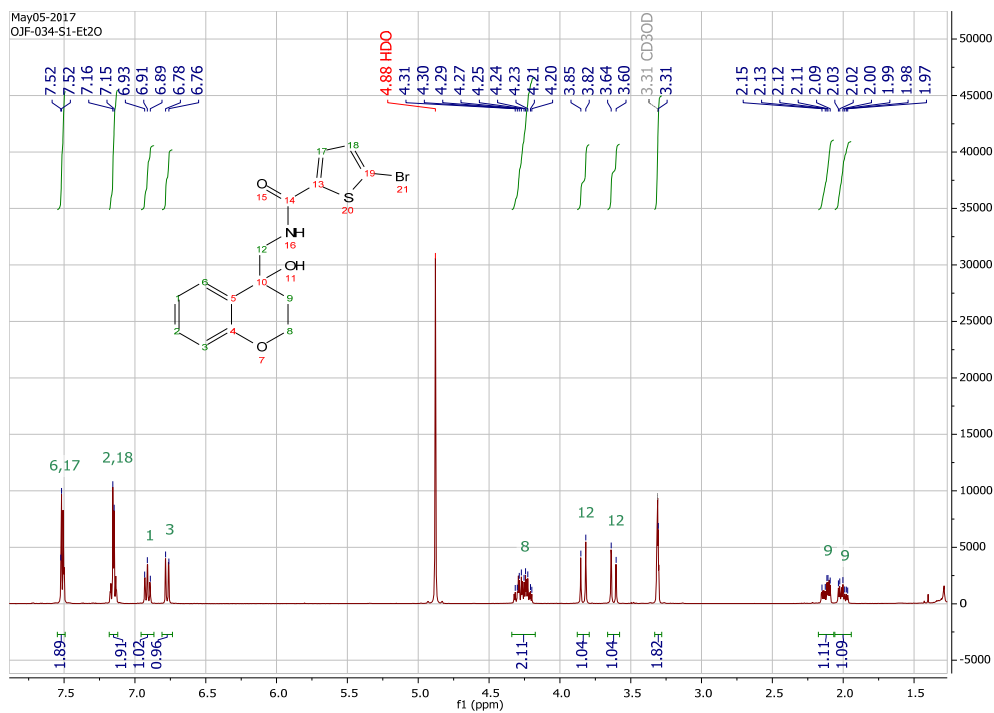

84

85 b.

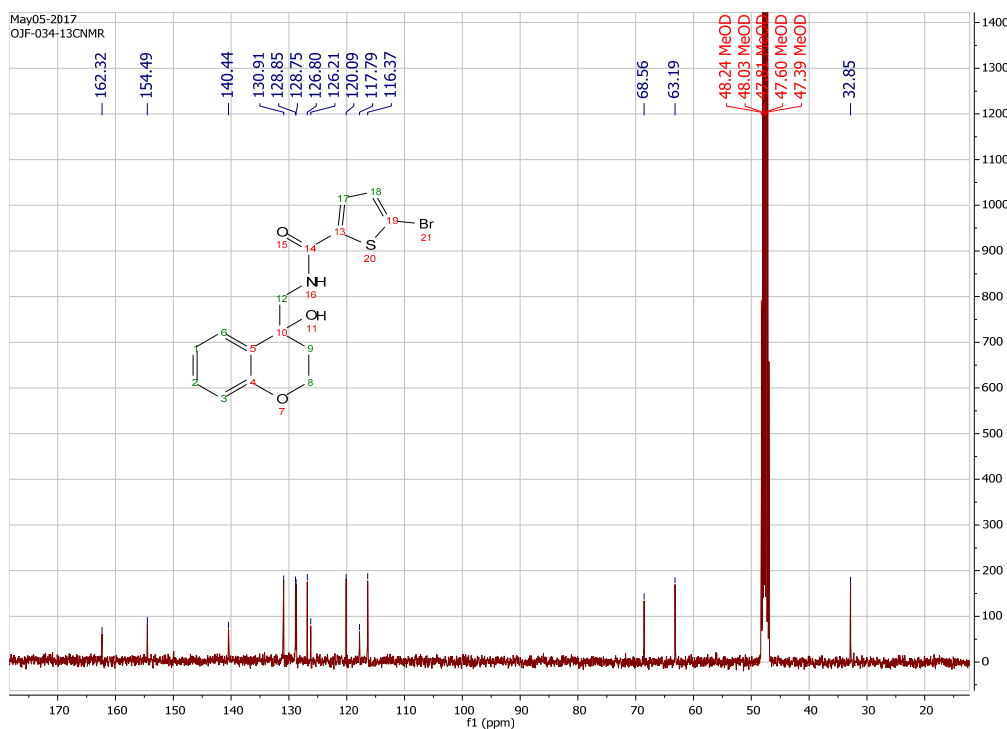

86

87 Supplementary Figure 4 | Structural analysis of OJF-034

88 The structure of OJF-034 was confirmed by: (a) <sup>1</sup>H NMR Spectra of OJF-034 and (b) <sup>13</sup>C NMR Spectra.

89 a.

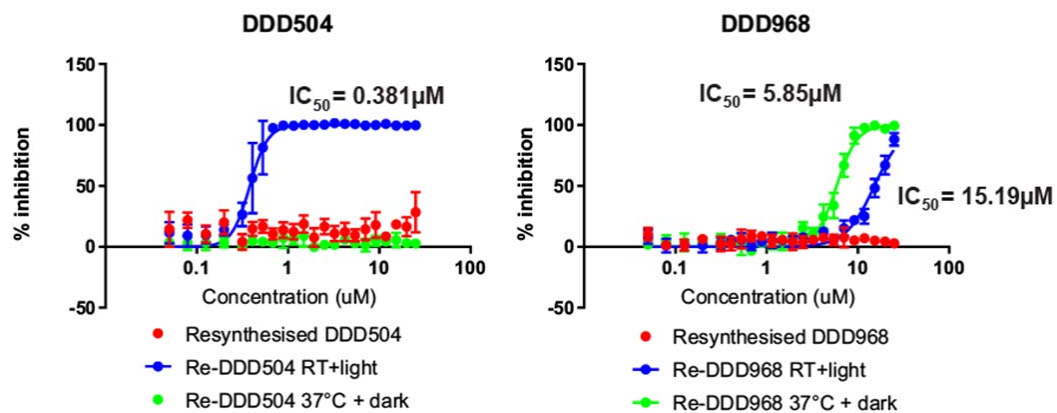

90

91 b.

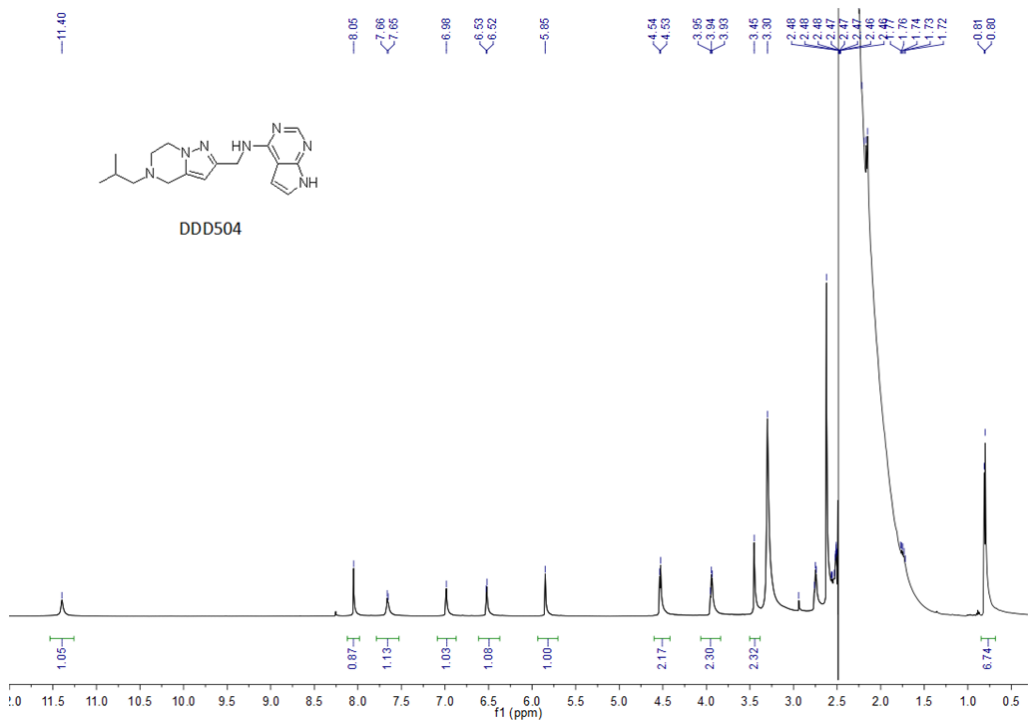

92

93



94 **c.**

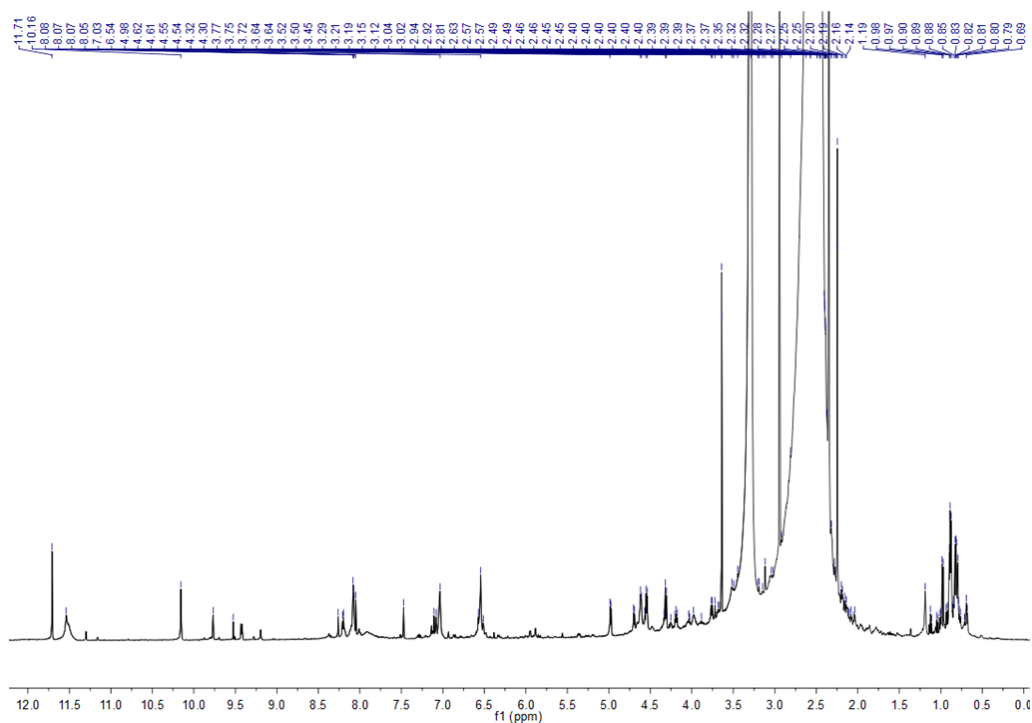

95

96 **Supplementary Figure 5 | The effect of aging on DDD504 and DDD968.**

97 (a) Re-synthesised DDD504 and DDD968 were inactive when re-tested in the Pf DGFA. It was hypothesised that  
98 both could be prone to oxidation and/or decomposition and so both molecules were aged to attempt to generate  
99 active by-products. Red = resynthesized compound. Blue = resynthesized compound after 10 days at room  
100 temperature in the light. Green = resynthesized compound after 10 days at 37°C in the dark. Error bars denote  
101 the standard deviation. (b) Structure activity relationship between DDD504 and analogues in the Pf DGFA. <sup>1</sup>H-  
102 NMR spectra of compound DDD504 before and after submitting it to the aging process. Clean spectra of the  
103 synthesized compound in DMSO. (c) Spectra of the aged compound showing a complex mixture. The loss of the  
104 signal at 5.85 ppm could be observed.

105

106

107

108  
109

a.

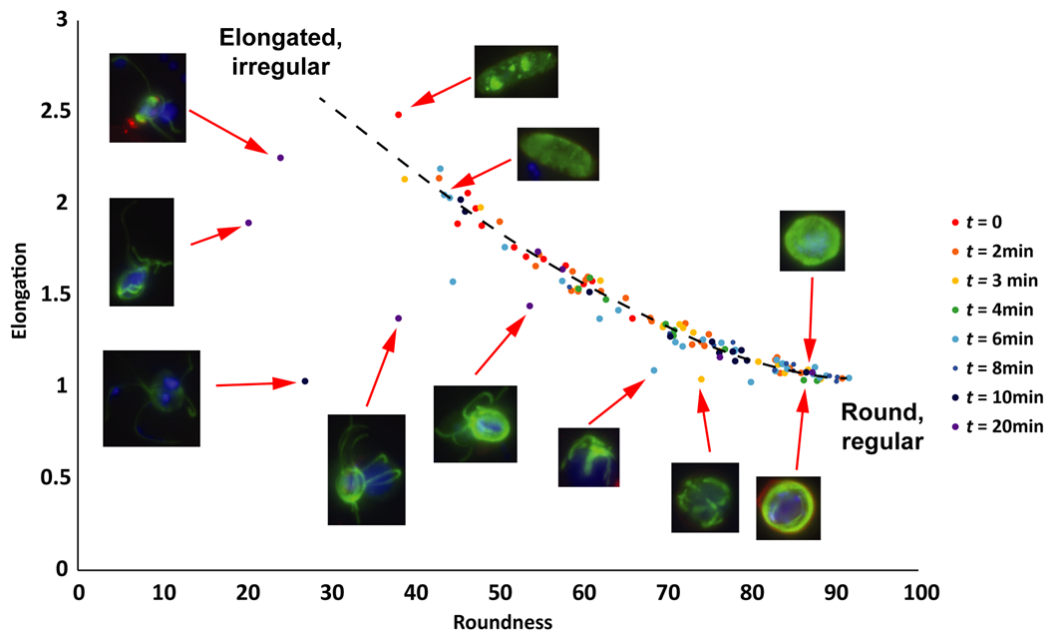

110  
111

b.

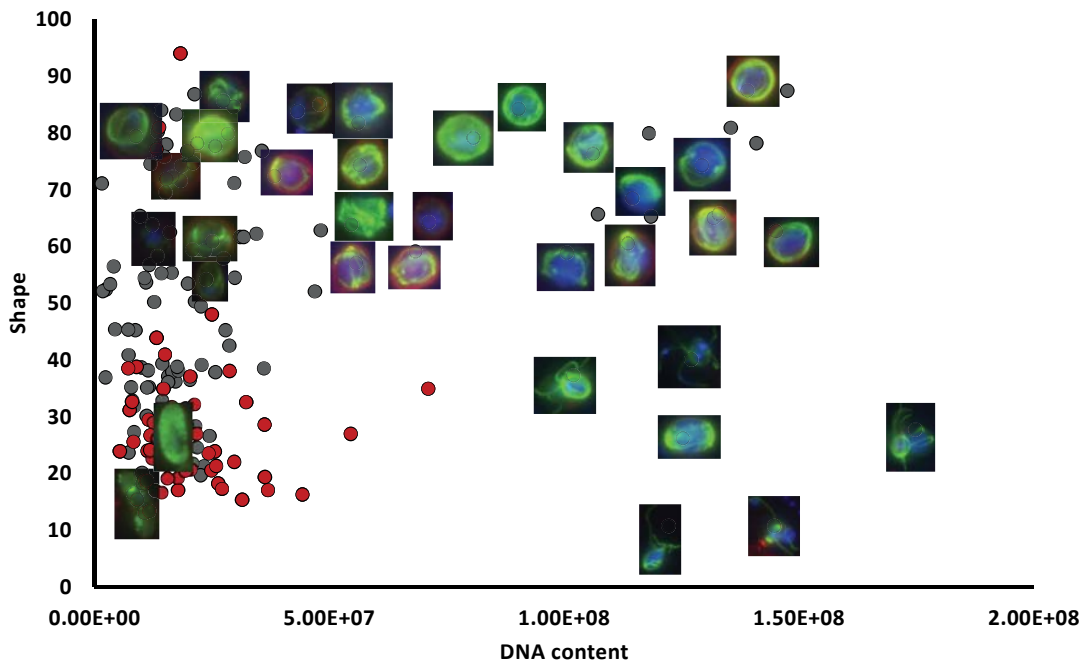

112  
113  
114  
115

**Supplementary Figure 6 | The relationship between cell roundness, elongation and DNA content.**

116 (a) With the progression of male gametogenesis, activated cells round up and lose their falciform shape. This  
117 transformation in roundness and regularity is initially proportional. However, as gametes begin to emerge, the  
118 proportionality is destroyed and exflagellating cells can be easily identified by position on the graph. (b) As  
119 Figure 4C from the main text with raw images overlaid onto selected data points to illustrate typical phenotypes  
120 of cells undergoing male gametogenesis over time. Red dots show the initial distribution of cells before induction  
121 ( $t = 0$  min) and grey dots show induced cells ( $t = 2-20$  min).

122 **SUPPLEMENTARY TABLES**

123 **Supplementary Table 1. Stability analysis of DDD599/BPCA**

|                          | pH10 Ox  | pH10     | pH6 Ox      | pH6         | pH4 Ox      | pH4         | SGF Ox      | SGF       | GSH      |
|--------------------------|----------|----------|-------------|-------------|-------------|-------------|-------------|-----------|----------|
| Half-life                | 92 hours | 94 hours | >1000 hours | >1000 hours | >1000 hours | >1000 hours | >1000 hours | 607 hours | <1 hours |
| t10% degradation / hours | 18 hours | 18 hours | >1000 hours | >1000 hours | >1000 hours | >1000 hours | 512 hours   | 118 hours | <1 hours |
| % remaining at 24h       | 87%      | 87%      | 100%        | 100%        | 100%        | 100%        | 99%         | 98%       | 0%       |

KEY

pH10 Ox = Britton Robinson pH10 buffer + 20M% H2O2

pH10 = Britton Robinson pH10 buffer

pH6 Ox = Britton Robinson pH6 buffer + 20M% H2O2

pH6 = Britton Robinson pH6 buffer

pH4 Ox = Britton Robinson pH4 buffer + 20M% H2O2

pH4 = Britton Robinson pH4

SGF Ox = Simulated Gastric Fluid + 20M% H2O2

SGF = Simulated Gastric Fluid

GSH = Phosphate buffer pH7.4 with 5mM Glutathione

124

125 The stability of BPCA was tested in several pH buffers and simulated gastric fluid all with or without an oxidising  
 126 environment. Additionally, it was also tested in the presence of glutathione. Green text denoted acceptable  
 127 stability and red text denotes unacceptable stability under test conditions. At pH10 regardless of the presence of  
 128 H<sub>2</sub>O<sub>2</sub>, DDD599/BPCA was unfavourably unstable. Similarly, DDD599/BPCA is rapidly cleared in the presence of  
 129 glutathione with mass spec analysis showing de-chlorination of DDD599/BPCA and covalent attachment to  
 130 glutathione.

131

132

133 **SUPPLEMENTARY REFERENCES**

- 134 1 Glennon, R. A. & Liebowitz, S. M. Serotonin receptor affinity of cathinone and related  
 135 analogues. *J Med Chem* **25**, 393-397 (1982).  
 136 2 Ornstein, P. L. *et al.* 2-substituted (2SR)-2-amino-2-((1SR,2SR)-2-carboxycycloprop-1-  
 137 yl)glycines as potent and selective antagonists of group II metabotropic glutamate receptors. 2.  
 138 Effects of aromatic substitution, pharmacological characterization, and bioavailability. *J Med*  
 139 *Chem* **41**, 358-378, doi:10.1021/jm970498o (1998).

140
